# Supplementary material
Source: Springer Nature journal article supplement (https://www.springermedizin.de/resource/supplementary/13048_2008_13_MOESM5_ESM.pdf/9664746)
Supplement: MOESM5 [file 9664746]

**A**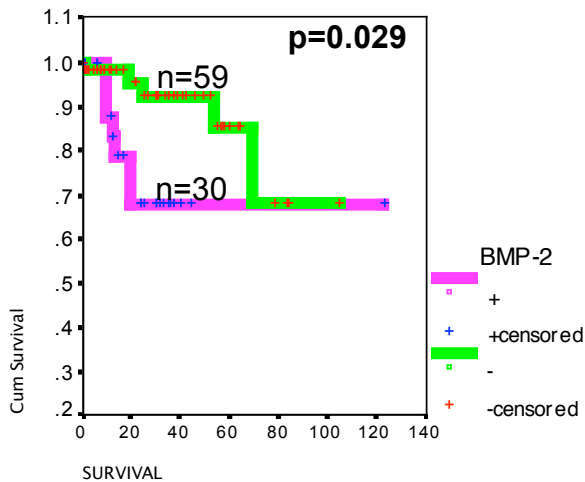**B**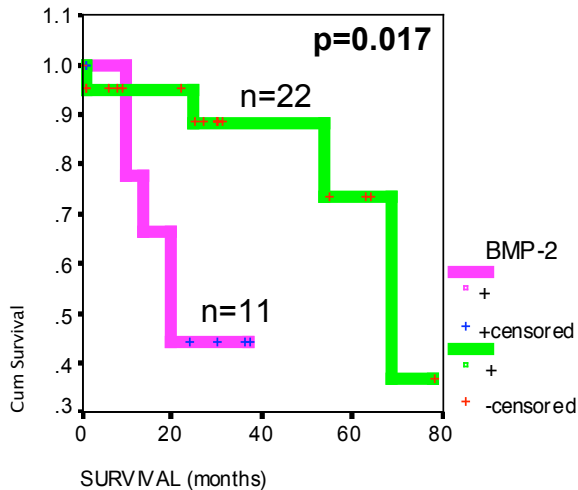**ROC Curve**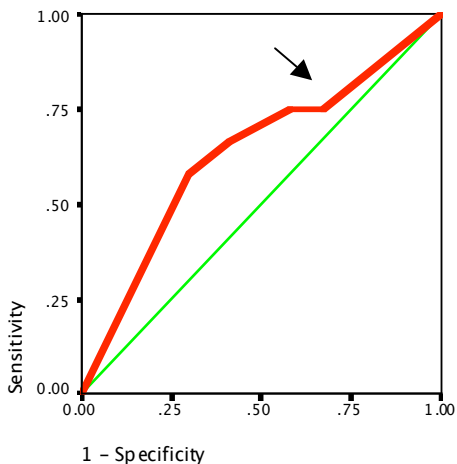

Diagonal segments are produced by ties.

**ROC Curve**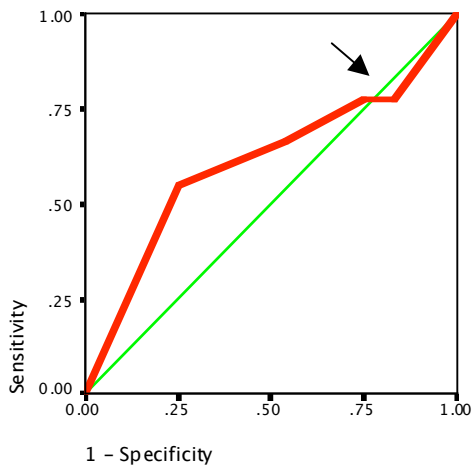

Diagonal segments are produced by ties.
